# Supplementary material for: An Environment-Wide Association Study (EWAS) on Type 2 Diabetes Mellitus
Source: PLoS One. 2010 May 20;5(5):e10746. doi: 10.1371/journal.pone.0010746 (PMC2873978; doi:10.1371/journal.pone.0010746)
Supplement: Table S3 — Adjusted odds ratios for validated factors, adjusting for age, sex, BMI, SES, ethnicity, cohort, log10(total triglycerides), log10(total cholesterol). Odds ratios are for a change in 1SD of the logarithm of exposure in association with T2D. (0.03 MB DOC) [file pone.0010746.s009.doc]

An Environment-Wide Association Study (EWAS) to Type 2 Diabetes (T2D)

Chirag J Patel, Jayanta Bhattacharya, Atul J Butte

***Table S3***. **Adjusted odds ratios for validated factors, adjusting for age, sex, BMI, SES, ethnicity, cohort, log10(total triglycerides), log10(total cholesterol).**

| **Environmental class** | **Environment Factor** | **Cohort** | **P** | **OR**  **(95% CI)** |
| --- | --- | --- | --- | --- |
| Nutrients | cis--carotene | 2001-2006 | < 0.001 | 0.7 (0.6-0.8) |
|  | trans--carotene | 2001-2006 | < 0.001 | 0.7 (0.6-0.8) |
|  | -tocopherol | 1999-2006 | < 0.001 | 1.4 (1.2-1.6) |
| Organochlorine Pesticides | Heptachlor Epoxide | 1999-2004 | < 0.001 | 1.6 (1.3-2.0) |
| Polychlorinated Biphenyls | PCB170 | 1999-2004 | 0.002 | 2.3 (1.4-3.7) |

Odds ratios are for a change in 1SD of the logarithm of exposure in association with T2D.
